# Supplementary material
Source: PubMed Central journal article supplement (PMC3813848)
Supplement: 9aa398ced17585e8b43abec9b49c0125_genetics.113.156075-7.pdf [file 9aa398ced17585e8b43abec9b49c0125_genetics.113.156075-7.pdf]

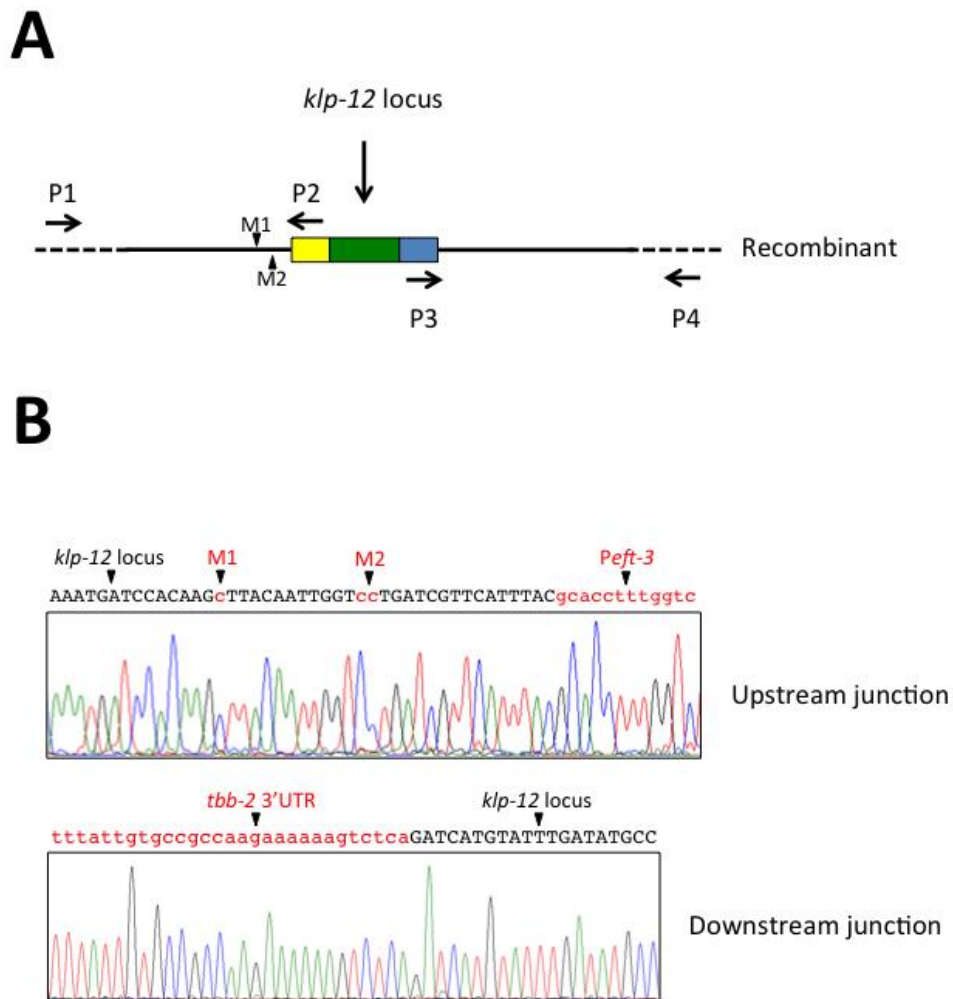

**Figure S1** Confirmation of seamless recombination at the *klp-12* locus. Upper panel shows a sequence trace of the upstream recombinant junction. Endogenous upstream *klp-12* sequence is flanked by the M1 and M2 mutations described in Figure 2A, and the beginning of the *eft-3* promoter sequence. Bottom panel shows a sequence trace of the downstream recombinant junction, marking the end of the *tbb-2* 3'UTR followed again by endogenous *klp-12* sequence. All introduced sequences are labeled in red lower case letters.
