# Supplementary material
Source: PubMed Central journal article supplement (PMC3813848)
Supplement: 0548168105f1ab47594b7f5e6df09a73_genetics.113.156075-5.pdf [file 0548168105f1ab47594b7f5e6df09a73_genetics.113.156075-5.pdf]

**Table S1 List of oligonucleotide primers used in this study**

***klp-12* GFP transgene donor vector cloning and recombinant screening primers**

|                             |                                                               |
|-----------------------------|---------------------------------------------------------------|
| klp-12 F                    | CGACGTTGTA AACGACGGCCAGTGAATTCGATTCACACA ACTTGCGAAAATTCTTG    |
| klp-12 PAM mut HIII R       | GTAAATGAACGATCAGGACCAATTGTAAGCTTGTGGATCA                      |
| klp-12 PAM Peft-3 F         | CAATTGGTCCTGATCGTTCATTTACGCACCTTTGGTCTTTTATTGTCAACT           |
| Peft-3 GFP R (P2)           | GTGAAAAGTTCTTCTCCTTTACTCATTAAGCCTGCTTTTTGTACAACTTGTGAG        |
| GFP F                       | ATGAGTAAAGGAGAAGA ACTTTTTAC                                   |
| intron R                    | GTACCGAACTGTTTAAACTTACGTG                                     |
| intron GFP F                | CACGTAAGTTTAAACAGTTCGGTACTA ACTAACCATACATATTTAAATTTTCAGGTGCTG |
| GFP tbb-2 UTR R             | GGGAATGCTTGAAAGGATTTTGCATTTATCCTATTTGTATAGTTCATCCATGCCATG     |
| tbb-2 UTR F (P3)            | GATAAATGCAAATCCTTTCAAGCATTCC                                  |
| tbb-2 UTR klp-12 R          | GAGTAGGCATATCAAATACATGATCTGAGACTTTTTTCTTGGCGGCACA             |
| klp-12 ds F                 | GATCATGTATTTGATATGCCTACTC                                     |
| klp-12 R                    | AACAGCTATGACCATGATTACGCCAAGCTTGAAGACGTGTCAATTTCGAATCAC        |
| klp-12 us outside HR F (P1) | GAGCGAAAAGTGTCGGTTATTTACG                                     |
| klp-12 ds outside HR R (P4) | CATCAGTGTTCCGGCTGAAATGTGATAG                                  |

**Cloning *lab-1* upstream region**

|                     |                                  |
|---------------------|----------------------------------|
| lab-1-974UPSF-bglII | TTCTGAAGATCTGGAATGGACTGTCATTAGAC |
| lab1-2-UPSR-bglII   | TGGCTCAGATCTGTTGAATAAAGTCGAGGATC |

**Cloning *lab-1* downstream region**

|                     |                                   |
|---------------------|-----------------------------------|
| lab-1-24F-sacII     | TAATCGCCGCGGTCAA ACTCAAAAACGCTGTG |
| lab-1-840DWSR-SacII | CGCCGACCGCGGCAAGCTACTTGGTGACAATG  |

**Creating *lab-1* sgRNA**

|                   |                                                 |
|-------------------|-------------------------------------------------|
| lab-1 mgRNA-F-Cor | GATCTGGGTGCCCGATGAGTGT TTTAGAGCTAGAGCTAGAAATAGC |
| lab-1 mgRNA-R     | ACTCATCGGGCACCCAGATCAAACATTTAGATTTGCAATTCA      |

**Detecting *lab-1* knock-out and *gfp* knock-in**

|       |                     |
|-------|---------------------|
| CC01F | CTGCAGCGCAAATAATTCA |
|-------|---------------------|

bafP-R TTTGGCATCTGCCTCTCCTC  
**Amplifying and sequencing *lab-1* locus outside the donor vector homology region**  
lab1+1100-R GCATTGGTTAATCACTGGAA  
CC01F CTGCAGCGCAAATAATTCA  
gfp-N-R GTGCCATTAACATCACCAT

**RT-qPCR**

gpd-1F ACTCGTCCATTTTCGATGCT  
gpd-1R TCGACAACACGGTTCGAGTA  
lab-Ex34-RT-F CCAACCTCAGGAATCTGTGTCTT  
lab-405-RT-R CCTCGGATGTATCGGAATCC  
asfl-ex34-RT-R TCATCATCGTCCTCTTCCTCC  
asfl-532-RT-F CCATCATCATGCAATGGCAT  
T05F-Ex34-R TCCCAAGTTGCAATTTCAATAATC  
T05F-454-F GCTCATGATGAAATTCGCTACAA
