# Supplementary material
Source: PubMed Central journal article supplement (PMC3813848)
Supplement: c590ad9eb255b4618d56b4536ac7f0a5_genetics.113.156075-3.pdf [file c590ad9eb255b4618d56b4536ac7f0a5_genetics.113.156075-3.pdf]

cgcaaaaacgttgactttatctcggctttaaaggcaaaaactaaagaaaaataatgcattgagttagtaaaaaaattaattgtttcaaa  
 ttatagaaattattaaacgagcaagtcaggacgaaaftagaatcttggacctccaagatgcgcaaaaattatcttcatcttcttci  
 caattcccgttcactcgcctcgcactttatcaac(agatct)gtcagcgacatacgaatgaatcgattatcttagaggagaggcagat  
 gccaaaaaattacagtcaaaaagaagtattcgtgaaagagtgcgcaaatcgagagacgcagacagaatgcaaacgcgctccgct  
 gaactgtggccgccaagcgtttcgtttaaaggagcggtgtctatcttctatcttctgcccagttttatcttgcgcaactatcttttacta  
 cgatctcgaaaaatatttcaaagcaagaaagtaattatcttgcgttcagaaaccgagctcatgagtaaaaggagaagaactttcaactg  
 gagtt

■ Nucleotides 1 to 228 upstream of the *lab-1* ATG

■ *baf-1* promoter

■ Plasmid backbone

■ GFP

( ) BglII site used to clone *lab-1* upstream sequence

**Figure S3** Confirmation of seamless recombination at the *lab-1* locus. Sequence resulting from the PCR product generated by using primers 1100 base pairs upstream and downstream of *lab-1*. Sequences from the *lab-1* upstream region (violet), *baf-1* promoter (yellow), plasmid backbone (light blue), and *gfp* (green) are marked. The site by which the upstream fragment was cloned is marked with brackets.
