# Supplementary material
Source: PubMed Central journal article supplement (PMC3813848)
Supplement: de15f982cc596cb8e7c81b3550fc7b9f_genetics.113.156075-4.pdf [file de15f982cc596cb8e7c81b3550fc7b9f_genetics.113.156075-4.pdf]

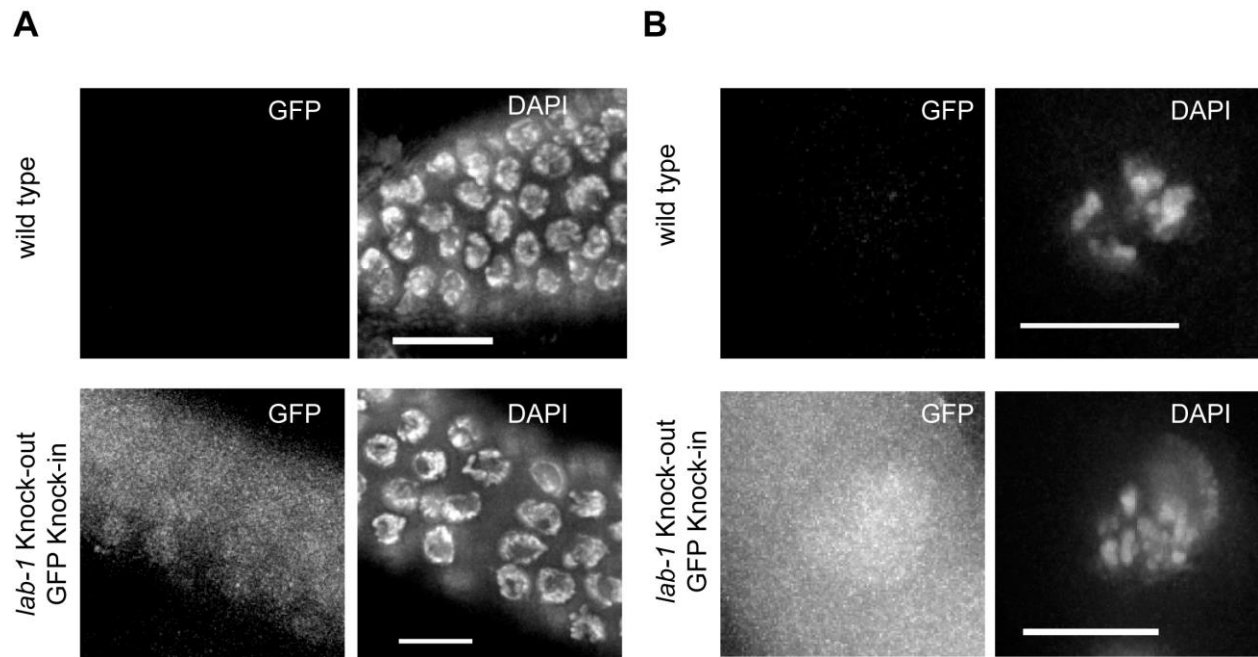

**Figure S2** Immunostaining of germline nuclei with an anti-GFP antibody to examine the expression of the *Pbaf-1::GFP* transgene inserted into the *lab-1* locus. Shown are meiotic nuclei in early prophase I (transition zone and early pachytene) (A), and diakinesis (B), from whole mounted gonads of wild type and *lab-1* knockout GFP knock-in worms, co-stained with DAPI and anti-GFP. Bars, 10mm.
