# Supplementary material
Source: PubMed Central journal article supplement (PMC3813848)
Supplement: edc55c5714e0920ec9f3b8211ef9fa8d_genetics.113.156075-2.pdf [file edc55c5714e0920ec9f3b8211ef9fa8d_genetics.113.156075-2.pdf]

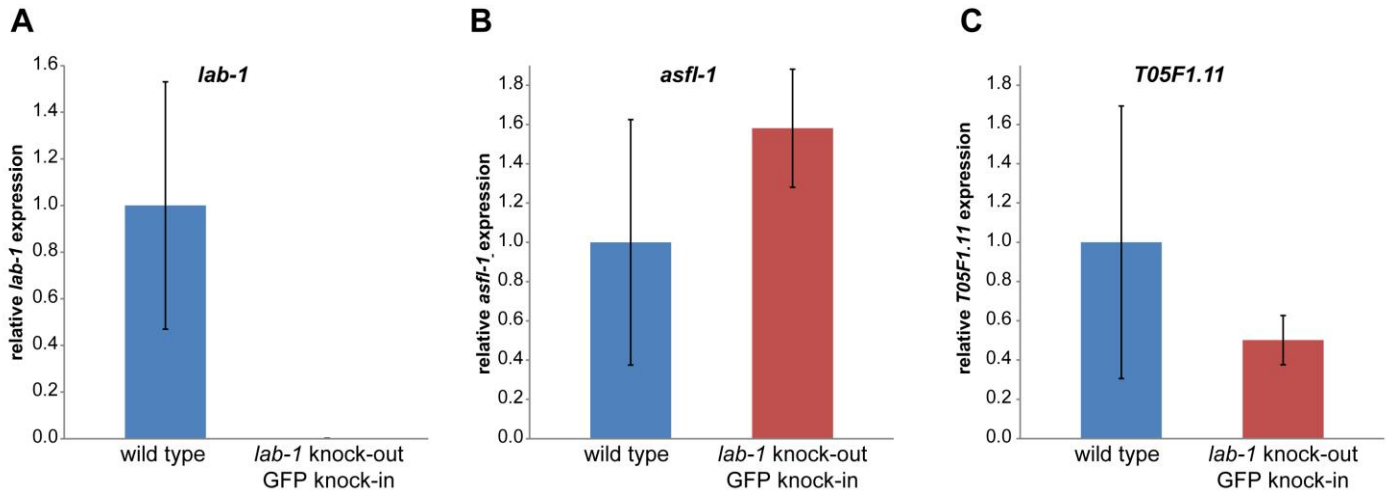

**Figure S4** *lab-1* knock-out and *GFP* knock-in effect on the expression of flanking genes. RT-qPCR expression analysis of *lab-1* (A), *asf1-1* (B), and *T05F1.11* (C). Relative  $\pm$  SEM values are presented. Sample values were normalized to *gpd-1* (GAPDH).
